# Supplementary material for: Role of matrix metalloprotease-2 and MMP-9 in experimental lung fibrosis in mice
Source: PubMed Central journal article supplement (PMC9270768; doi:10.1186/s12931-022-02105-7), 2022-07-08
Supplement: 12931_2022_2105_MOESM1_ESM.pdf [file 12931_2022_2105_MOESM1_ESM.pdf]

## **Additional File 1**

### **Role of Matrix Metalloprotease-2 and MMP-9 in experimental lung fibrosis in mice**

Tina Bormann, Regina Maus, Jennifer Stolper, Meritxell Tort Tarrés, Christina Brandenberger, Dirk Wedekind, Danny Jonigk, Tobias Welte, Jack Gauldie, Martin Kolb, and Ulrich A. Maus

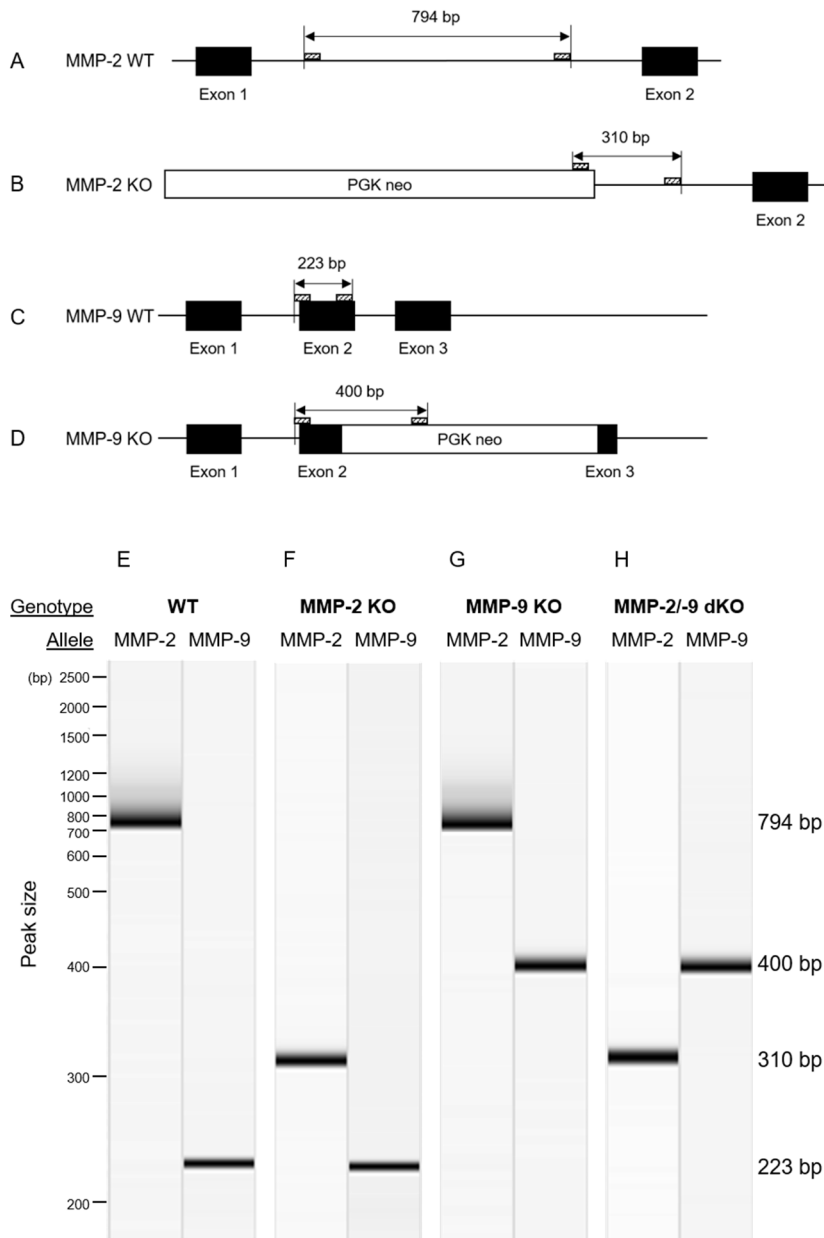

**Figure S1. Genotyping of MMP-2 KO, MMP-9 KO, and MMP-2/-9 double KO mice**

(A-D) Schematic overview of genotyping of MMP-2 KO (A,B) and MMP-9 KO mice (C,D) with specific primer binding sites for PCR amplification. (E-G) Genomic DNA was extracted from ear punches of WT, MMP-2 KO, MMP-9 KO and MMP-2/-9 dKO mice, and after MMP-2 and MMP-9 specific PCR amplifications, DNA was subjected to advanced capillary electrophoresis using the QIAxel system (Qiagen, Hilden, Germany). (E) PCR products of WT MMP-2 (794 bp) and WT MMP-9 (223 bp) alleles. (F) Genotype of MMP-2 KO mice displaying the expected WT MMP-9 allele and the mutated MMP-2 allele (310 bp). (G) Genotype of MMP-9 KO mice displaying the expected WT MMP-2 allele and the mutated MMP-9 allele (400 bp). (H) Genotypic profile of MMP-2/-9 dKO mice exhibiting mutated alleles for both MMP-2 and MMP-9.

**Table S1** Patient characteristics

| <b>Characteristics</b> | <b>Lung fibrosis</b>                                | <b>Disease control</b> |
|------------------------|-----------------------------------------------------|------------------------|
| Total number           | 20                                                  | 12                     |
| Subgroup               | IPF (12), PF-ILD (8), including HP (5) <sup>1</sup> | Neoplasia              |
| Men/women              | 11/9                                                | 6/6                    |
| Age (range)            | 57 (31-65)                                          | 66 (46-76)             |
| FEV1 (% predicted)     | 41.5±11.0                                           | 79.7±15.6              |
| FVC (% predicted)      | 40.9±11.8                                           | 89.6±19.8              |
| TLC (% predicted)      | 50.7±9.9                                            | 96.6±15.8              |

Values are expressed as mean±SD, and age as median (range). FEV, forced expiratory volume; FVC, forced vital capacity; HP, hypersensitivity pneumonitis; IPF, idiopathic pulmonary fibrosis; PF-ILD, progressive fibrosing interstitial lung disease; TLC, total lung capacity; UIP, usual interstitial pneumonia.

<sup>1</sup>PF-ILD with UIP pattern including hypersensitivity pneumonitis.
